# Supplementary material
Source: publisher site journal article supplement (https://www.dovepress.com/article/362980)
Supplement: Supplementary file 1 [file get_supplementary_file.php]

**Supplementary Table 1. The information intended to be extracted-the general characteristics of the included studies.**

| **Study characteristics** | | | | | | **Participants characteristics** | | | | | | |
| --- | --- | --- | --- | --- | --- | --- | --- | --- | --- | --- | --- | --- |
| Title | Authors | Journal | Year of publication | Country of study | Registry number | Age | Sex | Sample size | Number for analysis | Duration of LBP* | Inclusion criteria | Exclusion criteria |
|  |  |  |  |  |  |  |  |  |  |  |  |  |
|  |  |  |  |  |  |  |  |  |  |  |  |  |
|  |  |  |  |  |  |  |  |  |  |  |  |  |
|  |  |  |  |  |  |  |  |  |  |  |  |  |
|  |  |  |  |  |  |  |  |  |  |  |  |  |
|  |  |  |  |  |  |  |  |  |  |  |  |  |
|  |  |  |  |  |  |  |  |  |  |  |  |  |
|  |  |  |  |  |  |  |  |  |  |  |  |  |

*LBP: low back pain.

**Supplementary Table 2. The information intended to be extracted-the specific characteristics of the included studies.**

|  | **Design characteristics** | | | | | **Intervention characteristics** | | | | **Outcomes and measurements** | | | | | |
| --- | --- | --- | --- | --- | --- | --- | --- | --- | --- | --- | --- | --- | --- | --- | --- |
| Author  Year | Purpose | Design | Randomization | Allocation | Blinding | Group | Type | Frequency | Length | Primary outcomes | Secondary outcomes | Assessment indicators | Follow-up time points | Drop-out  rates | Adverse effects |
|  |  |  |  |  |  |  |  |  |  |  |  |  |  |  |  |
|  |  |  |  |  |  |  |  |  |  |  |  |  |  |  |  |
|  |  |  |  |  |  |  |  |  |  |  |  |  |  |  |  |
|  |  |  |  |  |  |  |  |  |  |  |  |  |  |  |  |
|  |  |  |  |  |  |  |  |  |  |  |  |  |  |  |  |
|  |  |  |  |  |  |  |  |  |  |  |  |  |  |  |  |
|  |  |  |  |  |  |  |  |  |  |  |  |  |  |  |  |
|  |  |  |  |  |  |  |  |  |  |  |  |  |  |  |  |

**Supplementary Table 3. The information intended to be extracted-the data for RevMan.**

| **Author**  **Year** | **Outcome** | **Measurements** | **Time point** | **For measurement data** | | | | | | **For enumeration data** | | | |
| --- | --- | --- | --- | --- | --- | --- | --- | --- | --- | --- | --- | --- | --- |
| **Intervention** | | | **Control** | | | **Intervention** | | **Control** | |
| **Mean** | **SD*** | **Total** | **Mean** | **SD*** | **Total** | **Events** | **Total** | **Events** | **Total** |
|  |  |  |  |  |  |  |  |  |  |  |  |  |  |
|  |  |  |  |  |  |  |  |  |  |  |  |  |  |
|  |  |  |  |  |  |  |  |  |  |  |  |  |  |
|  |  |  |  |  |  |  |  |  |  |  |  |  |  |
|  |  |  |  |  |  |  |  |  |  |  |  |  |  |
|  |  |  |  |  |  |  |  |  |  |  |  |  |  |
|  |  |  |  |  |  |  |  |  |  |  |  |  |  |
|  |  |  |  |  |  |  |  |  |  |  |  |  |  |
|  |  |  |  |  |  |  |  |  |  |  |  |  |  |
|  |  |  |  |  |  |  |  |  |  |  |  |  |  |
|  |  |  |  |  |  |  |  |  |  |  |  |  |  |

*SD: standard deviation.
